# Supplementary material for: A virus-free cellular model recapitulates several features of severe COVID-19
Source: PubMed Central journal article supplement (PMC8410838; doi:10.1038/s41598-021-96875-7), 2021-09-01
Supplement: 41598_2021_96875_MOESM1_ESM.pdf [file 41598_2021_96875_MOESM1_ESM.pdf]

## Supplementary Information

### **A virus-free cellular model recapitulates several features of severe COVID-19**

Giovanni Lavorgna\*<sup>1</sup>, Giulio Cavalli<sup>2,3</sup>, Lorenzo Dagna<sup>2,3</sup>, Silvia Gregori<sup>4</sup>, Alessandro Larcher<sup>1</sup>, Giovanni Landoni<sup>2,5</sup>, Fabio Ciceri<sup>2,6</sup>, Francesco Montorsi<sup>1,2</sup>, Andrea Salonia<sup>1,2</sup>

<sup>1</sup>Division of Experimental Oncology/Unit of Urology; URI; IRCCS Ospedale San Raffaele, Milan, Italy

<sup>2</sup>University Vita-Salute San Raffaele, Milan, Italy

<sup>3</sup>Unit of Immunology, Rheumatology, Allergy and Rare Diseases (UnIRAR), IRCCS San Raffaele Scientific Institute, Milan, Italy

<sup>4</sup>San Raffaele Telethon Institute for Gene Therapy (SR-TIGET), IRCCS Ospedale San Raffaele, Milan, Italy

<sup>5</sup>Anesthesia and Intensive Care Department, IRCCS Ospedale San Raffaele, Milan, Italy

<sup>6</sup>Hematology and Bone Marrow Transplant Unit, IRCCS Ospedale San Raffaele, Milan, Italy

**\*Corresponding author:** lavorgna.giovanni@hsr.it

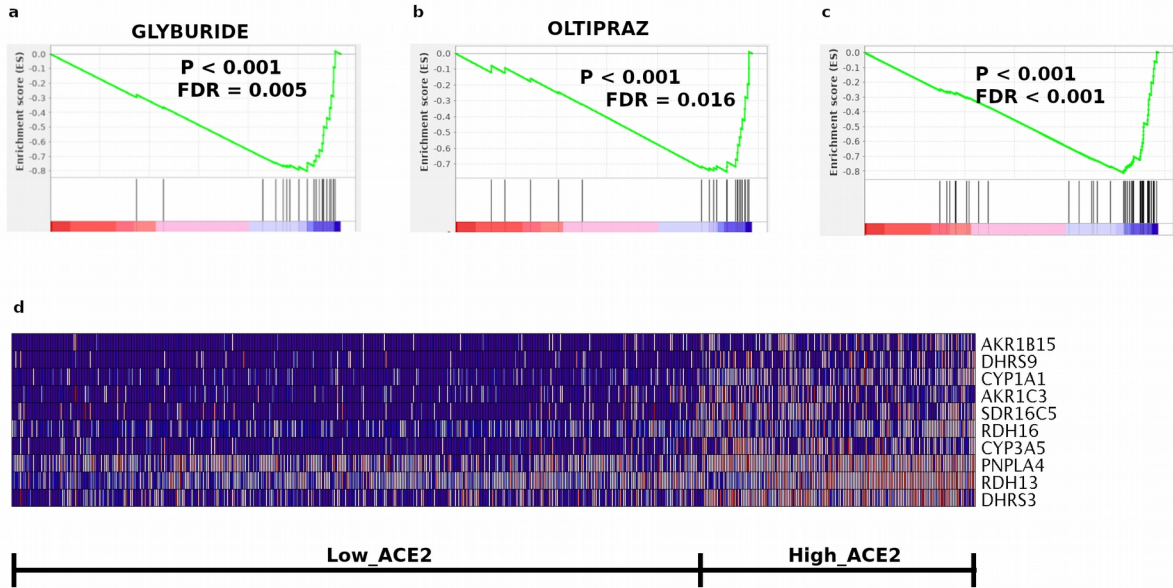

Supplementary Fig. 1

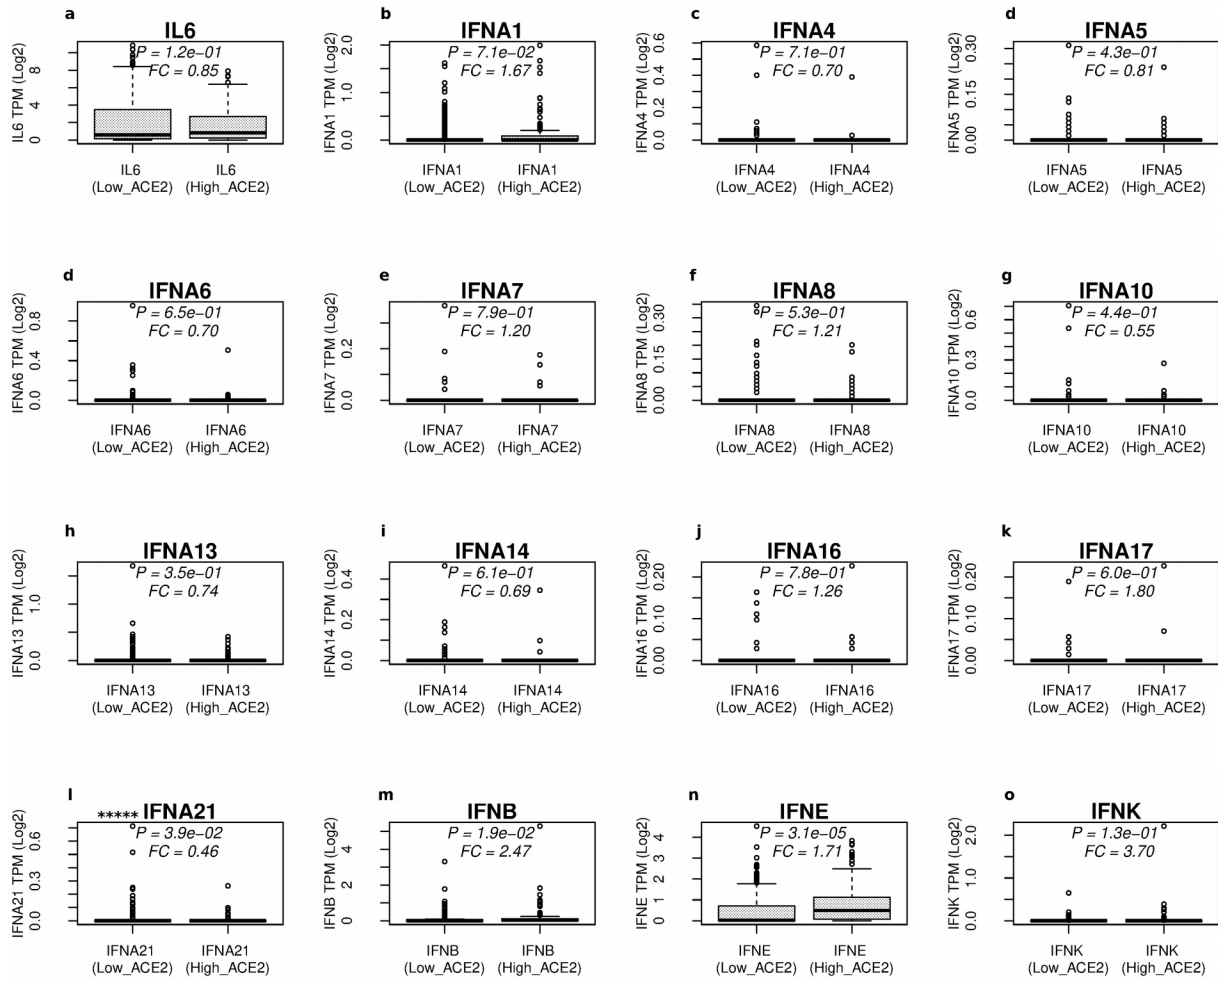

Supplementary Fig. 2

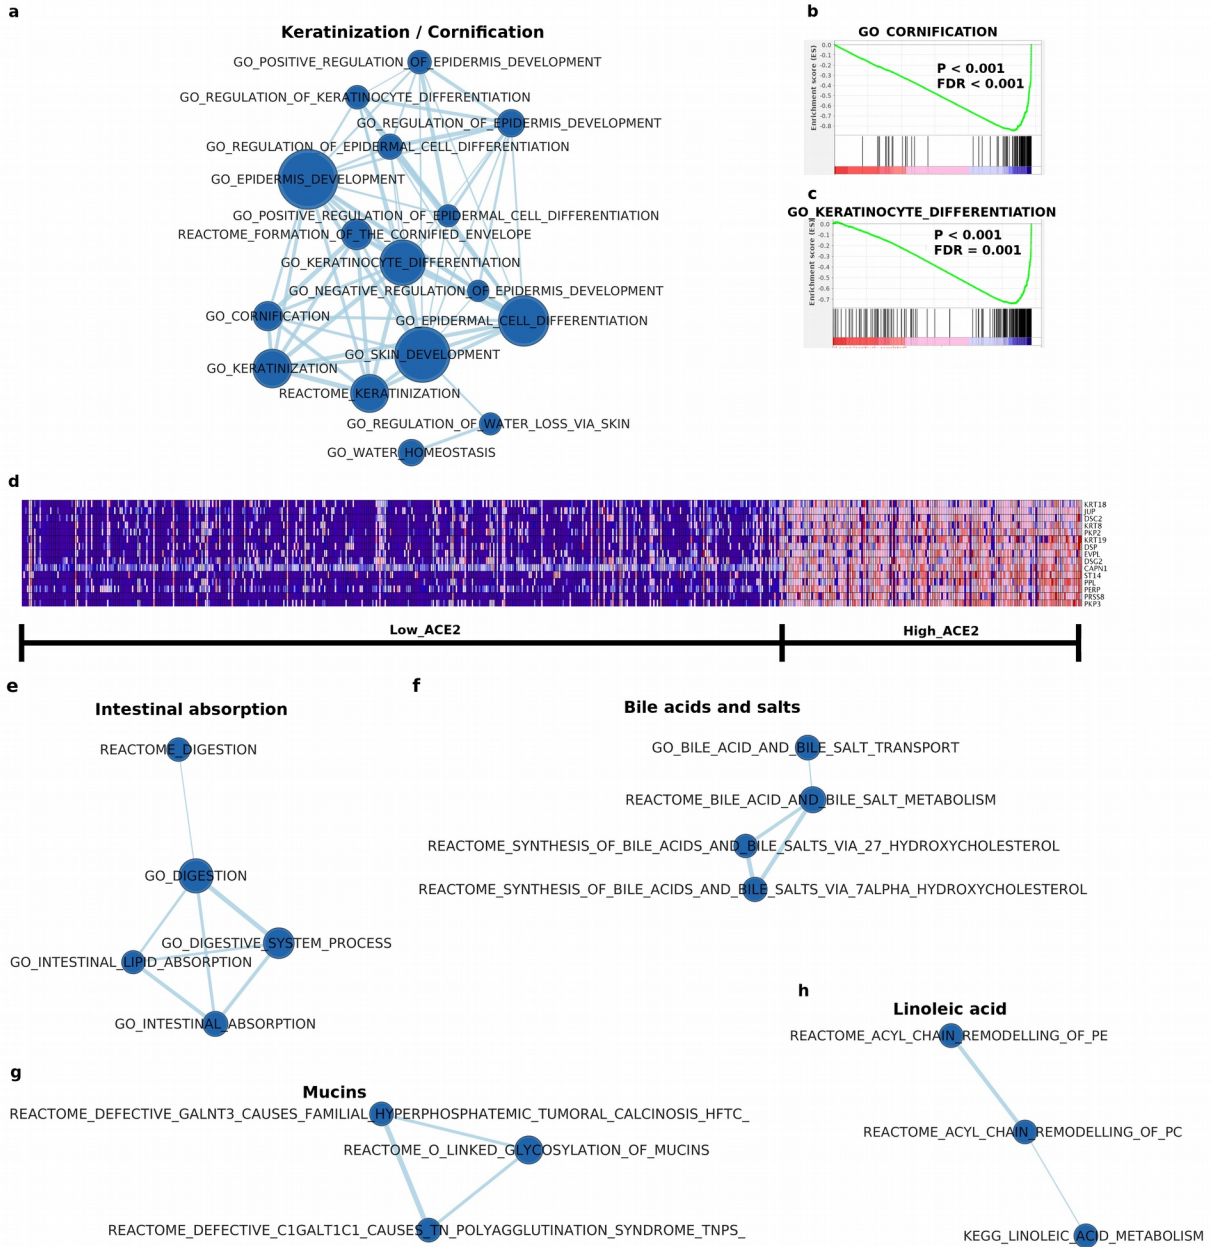

Supplementary Fig. 3

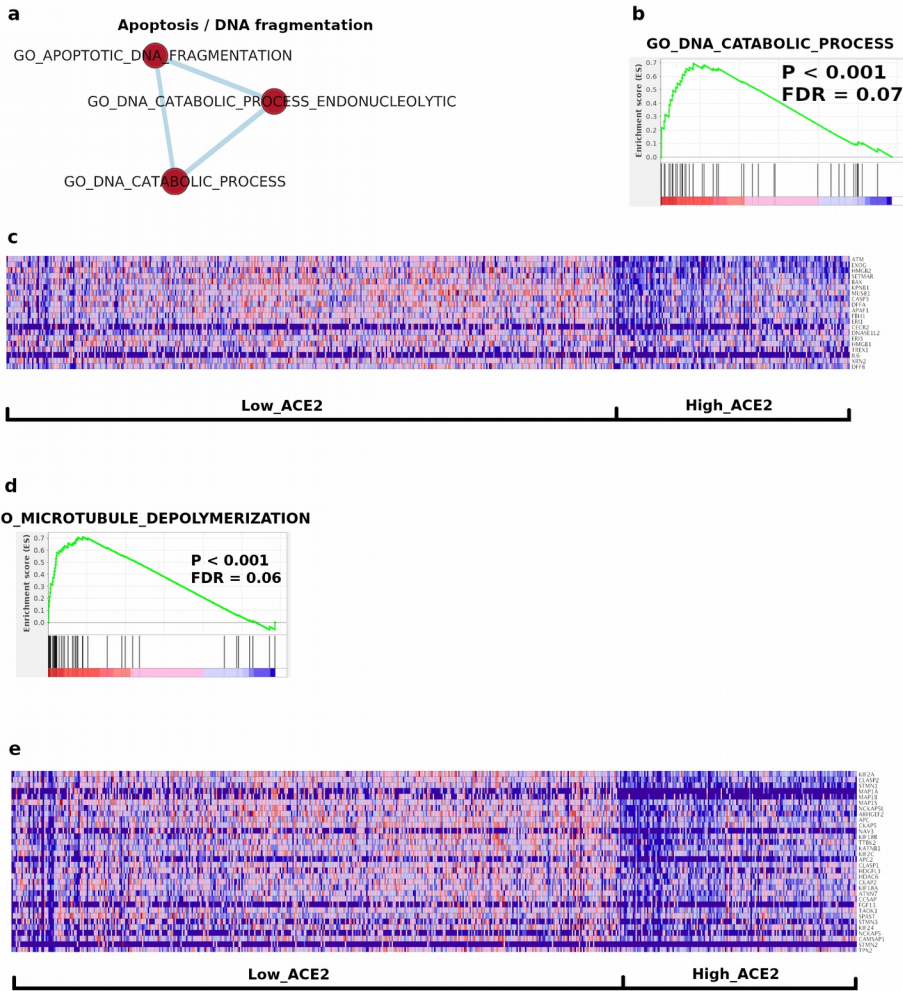

Supplementary Fig. 4

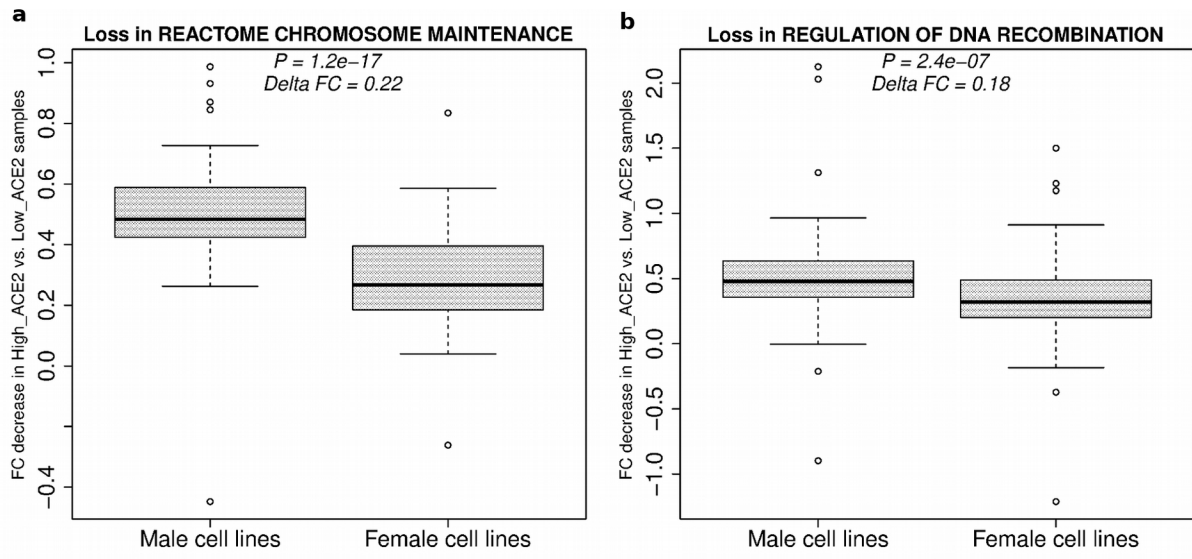

Supplementary Fig. 5

## Legends to Supplementary Figures

**Supplementary Figure 1.** Extended features of the molecular pathways linked to ACE2 overexpression in cell lines. **(a-c)** Datasets overexpressed in High\_ACE2 cell lines. **(d)** Heat map of the top-10 differentially expressed transcripts in the dataset 'GO\_RETINOL\_METABOLIC\_PROCESS'.

**Supplementary Figure 2.** Expression of IL6 **(a)** and type I interferon system genes in Low\_ACE2 and High\_ACE2 cell lines **(b-o)**. IFNA21 **(j)** gene plot, showing a significant downregulation in High\_ACE2 samples, is asterisked. FC: expression ratio of each transcript in High\_ACE2 vs. Low\_ACE2 cell lines.

**Supplementary Figure 3.** Additional features of the molecular networks linked to ACE2 overexpression. **(a)** Network of keratinization/cornification datasets overexpressed in High\_ACE2 cell lines. GSEA of cornification **(b)** and keratinization **(c)** datasets.**(d)** Heat map of the top-15 differentially expressed transcripts in the dataset 'GO\_CORNIFICATION'. **(e-h)**

**Supplementary Figure 4.** ACE2 overexpression is linked to both decreased apoptotic capability **(a-c)** and to decreased microtubule depolymerization **(d-e)**. Additional networks linked to ACE2 overexpression.

**Supplementary Figure 5.** Graph representation of differential gender expression of GO\_CHROMOSOME\_MAINTENANCE **(a)** and GO\_REGULATION\_OF\_DNA\_RECOMBINATION **(b)** genesets.

## **Legends to Supplementary Tables**

**Supplementary Table 1.** Differentially expressed transcripts in 'High ACE2' samples from the CCLE dataset

**Supplementary Table 2.** TermFinder analysis of the top 50 regulated transcripts in 'High-ACE2' samples from the CCLE dataset.

**Supplementary Table 3.** Gene sets significantly enriched or depleted in 'High ACE2' samples from cell lines of the CCLE project.

**Supplementary Table 4.** Gene sets showing preferential gender expression in ACE2 overexpressing cell lines.
